# Supplementary material
Source: PubMed Central journal article supplement (PMC5016256)
Supplement: NIHMS802005-supplement-3.pdf [file NIHMS802005-supplement-3.pdf]

# One-way membrane trafficking of SOS in receptor-triggered Ras activation

Sune M. Christensen<sup>1,†,§</sup>, Hsiung-Lin Tu<sup>1,†,‡</sup>, Jesse E. Jun<sup>2,†</sup>, Steven Alvarez<sup>1</sup>, Meredith G. Triplet<sup>1</sup>,  
Jeffrey S. Iwig<sup>3</sup>, Kamlesh K. Yadav<sup>4,¶</sup>, Dafna Bar-Sagi<sup>4</sup>, Jeroen P. Roose<sup>2,#,\*</sup>, Jay T. Groves<sup>1,#,\*</sup>

## Affiliations:

<sup>1</sup>Department of Chemistry, University of California, Berkeley, [California](#), USA.

<sup>2</sup>Department of Anatomy, University of California, San Francisco, [California, USA](#).

<sup>3</sup>Howard Hughes Medical Institute, Department of Molecular and Cell Biology, University of California, Berkeley, [California](#), USA.

<sup>4</sup>Department of Biochemistry, New York University School of Medicine, New York, USA.

§Present address: Novozymes A/S, [Bagsvaerd](#), Denmark.

‡ Present address: [Institute for Molecular Engineering, University of Chicago, Chicago, Illinois, USA](#)

¶ Present address: Department of Urology Icahn School of Medicine at Mount Sinai, New York, USA.

† These authors contributed equally [to this work](#).

# These authors [jointly supervised this work](#).

## Contact:

To whom correspondence should be addressed: [jeroen.roose@ucsf.edu](mailto:jeroen.roose@ucsf.edu) or [jtgroves@lbl.gov](mailto:jtgroves@lbl.gov)

Deleted: CA

Deleted: 94720

Deleted: CA 94143, USA.

Deleted: CA 94720

Deleted: , NY 10016

Deleted: 2880

Deleted: Department of Biosystems Science and Engineering, ETH Zürich, Basel, Switzerland. ... [1]

Deleted: , NY 10029

Deleted: also contributed equally

43 **Abstract**

44

45 SOS is a key activator of the small GTPase Ras. In cells, SOS-Ras signaling is thought to be  
46 initiated predominantly by membrane-recruitment of SOS via the adaptor Grb2 and balanced by  
47 rapidly reversible Grb2:SOS binding kinetics. However, SOS has multiple protein and lipid  
48 interactions that provide linkage to the membrane. In reconstituted membrane experiments, these  
49 Grb2-independent interactions are sufficient to retain SOS on the membrane for many minutes,  
50 during which a single SOS molecule can processively activate thousands of Ras molecules. These  
51 observations raise questions concerning how receptors maintain control of SOS in cells and how  
52 membrane-recruited SOS is ultimately released. We addressed these questions in quantitative  
53 reconstituted SOS-deficient [chicken](#) B cell signaling systems combined with single molecule  
54 measurements in supported membranes. These studies reveal an essentially one-way trafficking  
55 process in which membrane-recruited SOS remains trapped on the membrane and continuously  
56 activates Ras until it is actively removed via endocytosis.  
57

Deleted: the

59

## 60 Introduction

61

62 Ras is a membrane-anchored small GTPase that plays a central role in many signaling pathways.  
63 Ras can exist in an inactive (GDP-bound) or active (GTP-bound) state. Ras activation is mediated  
64 by a variety of Ras guanine nucleotide exchange factors (RasGEFs) that catalyze the exchange of  
65 Ras-bound nucleotide with cytoplasmic GTP{Campbell, 1998 #66;Chang, 2001 #36;Karnoub,  
66 2008 #50}. This process is opposed by Ras GTPase-activating proteins (RasGAPs) that enhance  
67 the intrinsic GTPase activity of Ras and thus promote Ras deactivation{Campbell, 1998 #66}.  
68 Ras activation must be tightly regulated; aberrant activation of Ras is responsible for many  
69 human cancers{Stephen, 2014 #73}.

70

71 Son of Sevenless (SOS) is a widely distributed RasGEF{McCormick, 1993 #40;Findlay, 2008  
72 #41;Groves, 2010 #42} and full activation of SOS through an allosteric mechanism results in  
73 digital patterns of receptor-induced Ras-kinase signaling{Das, 2009 #10;Jun, 2013 #38}. The  
74 activation of Ras by SOS is critical for diverse processes such as cell growth{Egan, 1993 #43}, T  
75 cell activation and development{Genot, 2000 #67;Kortum, 2011 #68;Jun, 2013 #38;Das, 2009  
76 #10}, early B cell development{Baltanas, 2013 #74}, embryogenesis{Wang, 1997 #76}, and  
77 differentiation of embryonic stem cells{Findlay, 2013 #7}.

78

79 Receptor-triggered activation of SOS is a multilayered process involving membrane recruitment,  
80 release of autoinhibition, and allosteric modulation by Ras. The initial membrane recruitment of  
81 SOS is thought to occur via association of PxxP motifs in the C-terminal proline-rich (PR)  
82 domain with Grb2, which in turn binds phospho-tyrosine motifs on activated receptors or  
83 transmembrane adaptor proteins{Egan, 1993 #43;Buday, 1993 #44;Gale, 1993 #45;Li, 1993  
84 #46;Rozakis-Adcock, 1993 #47;Findlay, 2008 #41;Groves, 2010 #42;Waterman, 2002  
85 #84;Chardin, 1993 #80}. SOS additionally contains a series of N-terminal domains with  
86 homology to Dbl (DH) and Pleckstrin (PH) as well as a Histone Fold (HF) domain (**Fig. 1a**),  
87 which can autoinhibit SOS activity when assayed in solution. On membranes, this autoinhibition  
88 is released through interactions with various membrane lipids{Gureasko, 2008 #4;Gureasko,  
89 2010 #5;Yadav, 2010 #18} (reviewed in ref. {Jun, 2013 #38}). Full activation of SOS is  
90 contingent on binding of Ras to an allosteric pocket situated at the rim of the REM and CDC25  
91 domains{Margarit, 2003 #1}. The REM and CDC25 domains in SOS1 together form the catalytic  
92 core, which we term SOS<sup>cat</sup> throughout the manuscript (**Fig. 1a**). Mutations in *SOS1* that perturb  
93 these regulatory functions result in altered signaling behavior and have been implicated in  
94 developmental disorders such as Noonan{Roberts, 2007 #19}, Costello and CFC-  
95 syndrome{Tumurkhuu, 2013 #39}. SOS2 has a very similar domain make-up, but appears  
96 somewhat redundant to SOS1 in cells{Baltanas, 2013 #74}; in this study we solely focus on  
97 SOS1.

98

99 Historically, SOS activation was rationalized in terms of a simple membrane recruitment model  
100 based on substrate accessibility (**Fig. 1b**). Grb2 binding to activated receptors recruits SOS-Grb2  
101 complex from the cytosol, thereby positioning SOS in proximity to membrane-anchored Ras and  
102 thus promoting nucleotide exchange{Egan, 1993 #52;McCormick, 1993 #40;Kholodenko, 2000  
103 #49}. However, the importance of Grb2-mediated membrane recruitment is challenged by  
104 observations that truncated SOS constructs lacking the PR domain still localize to the membrane  
105 upon receptor stimulation and are fully signaling competent, or even exhibit increased  
106 responsiveness, relative to the full length enzyme{Karlovich, 1995 #54;Corbalan-Garcia, 1998  
107 #3;McCollam, 1995 #53;Wang, 1995 #55;Zhao, 2007 #17;Roose, 2007 #64}. Recent work with  
108 mouse embryonic stem cells (mESC){Findlay, 2013 #7} demonstrated that, besides Grb2-  
109 facilitated membrane recruitment, SOS activity is governed by summation of weak to moderate

Deleted: Qian, 2000 #75;

Deleted: -

Deleted: Tartaglia, 2007 #20;

Deleted: and

Deleted: /

Deleted: Qian, 2000 #75;

Deleted: ;Kuriyan, 2007 #57

Deleted: In favor of this hypothesis, artificial membrane-targeting of SOS by farnesylation was found to trigger the Ras pathway in the absence of stimulatory cues<sup>33</sup>. Grb2 interactions with phospho-tyrosine exhibit relatively fast and reversible kinetics, both *in vitro*<sup>34</sup> and in live cells<sup>35</sup>, leading to the assumption that SOS recruitment follows the dynamic equilibrium established by Grb2. Recently, transient second scale interactions of SOS with the plasma membrane has also been reported upon activation of epidermal growth factor receptor in HeLa cells<sup>36</sup>.

130 protein-protein and protein-lipid interactions mediated by the multiple domains of SOS{Findlay,  
131 2013 #7;hen, 1997 #15;Yadav, 2010 #18;Zhao, 2007 #17}. These studies imply that the  
132 recruitment to membrane integral receptors via Grb2 is an oversimplified model for SOS function  
133 ([see also Supplementary Note 1](#)).

134  
135 We have observed that SOS constructs, lacking the Grb2 binding PR domain, are successfully  
136 recruited to reconstituted Ras functionalized membranes through Ras- and lipid-binding  
137 interactions. Additionally, a single SOS molecule has the capacity to processively activate  
138 thousands of Ras proteins during a single membrane residency period (**Fig. 1c,d**). This finding  
139 was realized using a micropatterned fluid supported lipid bilayer platform{Groves, 1997  
140 #69;Groves, 2002 #72} in which the catalytic activity of individual SOS molecules can be  
141 directly resolved{Iversen, 2014 #8}. Such high degrees of processivity and essentially  
142 irreversible membrane recruitment in the activation of Ras by SOS are not captured in earlier  
143 mechanistic and computational models of SOS activity, or in synthetic biology approaches using  
144 Grb2-SOS1 fusion proteins{Das, 2009 #10;Findlay, 2013 #7}. The question if such extreme  
145 processivity of SOS occurs in cells arises immediately, and if so, how is it being regulated?

146  
147 [To address this question we mapped the individual contributions of the different domains in](#)  
148 [SOS1 to membrane association through a series of single molecule dwell time measurements and](#)  
149 [bulk kinetic observations. These studies utilized a reconstituted membrane system in combination](#)  
150 [with quantitative cell-based signaling assays \(for more details see Supplementary Note 1\).](#)  
151 [Altogether, our](#) results reveal an essentially one-way trafficking process in which membrane-  
152 recruited SOS1 remains trapped on the membrane and continuously activates Ras until it is  
153 actively removed, such as by endocytosis. This mechanism differs substantially from the  
154 reversible Grb2 dependent process that has been generally assumed{Egan, 1993 #43;Buday, 1993  
155 #44;Gale, 1993 #45;Li, 1993 #46;Rozakis-Adcock, 1993 #47;Groves, 2010 #42;Findlay, 2008  
156 #41}. The Ras activation machinery can remain active or be inactivated irrespective of the  
157 triggering state of the receptor that initiated the signal. This significantly impacts the quantitative  
158 input-response function for Ras activation by receptor triggering and underscores the importance  
159 of strong inhibition of spontaneous SOS [activation](#).

## 160 Results

### 161 Supported lipid bilayer SOS activation assay

162  
163 We developed an imaging assay to study the interaction of SOS with Ras on Supported Lipid  
164 Bilayers (SLBs, **Fig. 2a**). In this experimental configuration, H-Ras (1-181, C118S) (henceforth  
165 referred to as Ras) was coupled at C181 to the bilayer via a maleimide functionalized lipid (online  
166 Methods), yielding permanently bound and laterally mobile Ras that is fully functional with  
167 respect to SOS activity{Gureasko, 2008 #4;Lin, 2014 #9;Iversen, 2014 #8} (**Supplementary Fig.**  
168 **1a**). A calibration curve obtained using fluorescence correlation spectroscopy (FCS) provided  
169 access to the local surface density of Ras via epifluorescence imaging of [Ras-bound](#) fluorescent  
170 nucleotide labels ([GDP- and GTP-BODIPY](#), **Supplementary Fig. 1b** and ref. {Iversen, 2014  
171 #8}). Labeling of SOS with a photostable and bright fluorophore (ATTO 647N) facilitated  
172 reliable counting and tracking of individual SOS molecules at the membrane surface by total  
173 internal reflection fluorescence microscopy (TIRFM). Control experiments [showed](#) that labeling  
174 did not perturb the observed activity of SOS (**Supplementary Fig. 1c**).

175  
176 In this system, [measurements are initiated by flowing](#) purified SOS1 over the Ras functionalized  
177 SLBs in a transient pulse with a defined concentration profile (**Fig. 2a**, left). During such a pulse,  
178 SOS1 interacts with [membrane-bound](#) Ras and, in the absence of free nucleotide in solution,

Deleted: /

Deleted: .

Deleted: Here we quantitatively mapped out the individual contributions of each of the multiple domains in SOS1 to the membrane association of SOS through a series of single molecule membrane binding dwell time measurements and bulk kinetic observations using a reconstituted membrane assay system that were combined with quantitative cell-based signaling assays (for more details see Supplementary Notes). Observations confirm RasGTP binding by the SOS1 allosteric site as a significant mode of membrane recruitment, and likely the major way that SOS1 lacking the Grb2 binding domain responds to receptor triggered signals. This enhanced membrane recruitment to RasGTP relative to RasGDP provides an apparent allosteric activation effect in the ensemble, even without actual enhancement of the overall molecular catalytic rate, which has been experimentally demonstrated by single molecule experiments to be independent of nucleotide state<sup>46</sup>. Collectively, Ras- and lipid-binding interactions in the N-terminal domains lead to extremely stable membrane association of SOS1, thus raising the possibility that some additional process may be required to get SOS1 off the membrane in living cells. ... [2]

Deleted: these

Deleted: based

Deleted:

Deleted: Fluorescence recovery after photobleaching (FRAP) confirmed the lateral mobility of fluorescently labeled lipids and Ras loaded with fluorescent nucleotide analogs (GDP- and GTP-BODIPY) (**Supplementary Fig. 1**).

Deleted: Ras surface densities in the experiments ranged from 100-400 molecules per square micrometer, which is comparable to Ras densities measured at the plasma membrane<sup>8</sup>.

Deleted: were conducted to verify

Deleted: 2

Deleted: measurements can be initiated by flowing

Deleted: different versions of

Deleted: protein was flowed

Deleted: on the membrane

232 becomes trapped upon binding Ras at the catalytic site{Bos, 2007 #2;Corbalan-Garcia, 1998 #3}.  
233 This provided a convenient way of quantifying the probability of SOS1 engaging Ras by directly  
234 counting the number of SOS1 molecules remaining at the bilayer after a pulse (**Fig. 2b** and online  
235 Methods). Chasing with unlabeled nucleotide initiated the exchange reaction and resulted in  
236 processive (i.e., sustained) turnover of Ras by the recruited and successfully activated SOS1  
237 molecules (**Fig. 2a**, right, and **Supplementary Fig. 1d**). A constant flow during the experiment  
238 ensured that dissociated SOS1 was removed from the reaction chamber, thus permitting  
239 measurement of desorption kinetics.

#### 241 *Allosteric activation of SOS via altered membrane recruitment*

242  
243 An important functional aspect of SOS1 in the cellular context is its activation by RasGTP  
244 binding to an allosteric site, located between the CDC25 and Ras exchanger motif (REM)  
245 domains in the catalytic core termed SOS<sup>Cat</sup>{Margarit, 2003 #1}. This allosteric activation  
246 depends sensitively on the nucleotide state of Ras{Boykevisch, 2006 #13} and is thought to  
247 enable a RasGTP positive-feedback loop operating at the membrane{Das, 2009 #10;Jun, 2013  
248 #38}.

249  
250 Allosteric binding of Ras by SOS also provides an alternate mechanism to recruit SOS to the  
251 membrane. Here, we first quantitatively analyzed recruitment by examining the SOS<sup>Cat</sup> module  
252 that harbors both the active site and the allosteric Ras binding pocket, but lacks any lipid binding  
253 domains{Margarit, 2003 #1}. SOS<sup>Cat</sup> was recruited to the Ras bilayer during the pulse phase of  
254 the assay (**Fig. 2c**). The known concentration profile of SOS<sup>Cat</sup> during the pulse combined with  
255 locally measured Ras densities permitted quantitating the recruitment probability from the  
256 adsorption traces (j.e., the probability that a SOS<sup>Cat</sup> molecule gets trapped upon collision with Ras  
257 at the membrane (**Fig. 2d** and online Methods)).

259 We found that membrane recruitment of SOS<sup>Cat</sup> was sensitive to the nucleotide state of Ras with  
260 ~16 fold enhancement on SLBs displaying RasGTP (**Fig. 2d**). A Y64A point mutation in Ras,  
261 previously shown to abolish Ras binding to the catalytic site of SOS{Hall, 2001 #11}, resulted in  
262 only transient recruitment of SOS<sup>Cat</sup>, demonstrating that, as expected, SOS is trapped at the  
263 membrane upon binding Ras at the catalytic site in the absence of free nucleotide (**Fig. 2c**).  
264 Nucleotide-dependent recruitment was preserved for Ras<sup>Y64A</sup>, indicating that the allosteric binding  
265 pocket is the primary determinant for this property of SOS<sup>Cat</sup> (**Fig. 2d**). A W729E point mutation  
266 in SOS1, known to prevent binding of allosteric Ras{Sondermann, 2004 #12;Das, 2009 #10},  
267 essentially abrogated recruitment (**Fig. 2c,d**). Upon chasing with nucleotide, a population of  
268 highly processive SOS<sup>Cat</sup> remained at the membrane (**Fig. 2c**, note the tail of the curve), which we  
269 identify as successfully activated SOS<sup>Cat</sup> molecules. The long-lived (minute to hour scale)  
270 membrane-bound SOS<sup>Cat</sup> was catalytically active (**Supplementary Fig. 1d** and ref. {Iversen,  
271 2014 #8}), indicating that release of SOS from the membrane was predominantly limited by the  
272 allosterically bound Ras.

273  
274 We substantiated our findings in the SLB experiments with cellular assays (see **Supplementary**  
275 Note 2 and **Supplementary Fig. 2a-d**). Collectively, the data demonstrate a very distinct positive  
276 allosteric effect of RasGTP at the stage of membrane recruitment. These results, taken together  
277 with the insensitivity of the average specific activity of SOS to the nucleotide state of  
278 Ras{Iversen, 2014 #8}, indicate that RasGTP-mediated recruitment of SOS via its allosteric site  
279 is one mechanism by which the well-known accelerating effect of RasGTP on SOS mediated Ras  
280 activation is achieved (commonly referred to as positive feedback){Gureasko, 2008 #4;Das, 2009  
281 #10;Boykevisch, 2006 #13}.

282

**Deleted:** of pausing the reaction cycle and allowed us to

**Deleted:** at the membrane

**Deleted:** ,

**Deleted:** 2b

**Deleted:** SOS1 dissociates from the membrane whenever it simultaneously unbinds at all membrane interaction sites.

**Deleted:** the

**Deleted:** In parallel, SOS1-mediated nucleotide exchange activity on Ras could be assessed by recording the decay of fluorescence as labeled nucleotides were replaced by non-fluorescent nucleotides<sup>23,46</sup> (**Supplementary Fig. 2b**).

**Deleted:** by RasGTP

**Deleted:** -

**Deleted:** , such as during T cell activation

**Deleted:** Single molecule studies of SOS1 activity revealed that allosteric binding of RasGTP to SOS does not increase the average rate of Ras activation per molecule of SOS. Instead, fluctuation dynamics of SOS among several activity states exhibit marked sensitivity to allosteric binding of RasGTP—possibly representing a new form of allosteric regulation<sup>46</sup>.

**Deleted:** defined

**Deleted:** , defined

**Deleted:** as

**Deleted:** ,

**Deleted:** Membrane

**Deleted:** was

**Deleted:** of Ras

**Deleted:**

**Deleted:** species were

**Deleted:** 2b

**Deleted:** our

**Deleted:** assays

**Deleted:** S

**Deleted:** s

**Deleted:** 3

**Deleted:** -

... [3]

**Deleted:** these three approaches

### 328 | *Regulation of membrane binding by N-terminal domains*

329  
330 | It is not known if membrane recruitment and retention of SOS<sup>Cat</sup> are influenced by its flanking  
331 | lipid-binding domains. At the N-terminal side, the catalytic core of SOS1 is flanked by a DH-PH  
332 | cassette and a HF domain (Fig. 3a). Structural and biochemical studies have shown that the N-  
333 | terminal domains exert an autoinhibitory effect on SOS1 activity, presumably through steric  
334 | obstruction of the allosteric Ras binding pocket as observed in crystal structures{Gureasko, 2010  
335 | #5;Sondermann, 2004 #12}. The PH domain interacts with phosphatidylinositol 4,5-bisphosphate  
336 | (PIP<sub>2</sub>) lipids{Chen, 1997 #15;Kubiseski, 1997 #16} and phosphatidic acid (PA){Zhao, 2007 #17}  
337 | and the HF domain harbors several additional interaction sites for negatively charged  
338 | lipids{Gureasko, 2010 #5;Yadav, 2010 #18}. These lipid interactions are generally believed to  
339 | play a role in the release of autoinhibition, but the underlying mechanisms are at this stage  
340 | unclear.

341  
342 | We observed a pronounced damping effect on initial membrane recruitment of SOS1 upon adding  
343 | the N-terminal domains to SOS<sup>Cat</sup>. Appending the DH-PH unit to the catalytic core (SOS<sup>DPC</sup>)  
344 | reduced recruitment to the membrane by ~3 fold. Inclusion of the full N-terminus (construct  
345 | comprising HF-DH-PH-Cat domains (SOS<sup>HDPC</sup>)) damped recruitment ~66 fold relative to SOS<sup>Cat</sup>  
346 | (Fig. 3b). Even in the case of the highly autoinhibited HDPC construct, Ras-specific binding was  
347 | evident (Supplementary Fig. 2e). These observations clearly demonstrate that a major property  
348 | of the N-terminus is to down-modulate spontaneous SOS1 activation by hindering its initial  
349 | recruitment to the membrane, consistent with the steric hindrance of the allosteric Ras binding  
350 | site observed in structures{Sondermann, 2004 #12;Gureasko, 2010 #5}. Interestingly, a gain of  
351 | function R552G point mutation associated with Noonan syndrome (SOS<sup>HDPC(R552G)</sup>){Roberts, 2007  
352 | #19} caused a slight relief of such inhibition compared to SOS<sup>HDPC</sup> (Fig. 3b and Supplementary  
353 | Fig. 3a), emphasizing the importance of a tightly regulated membrane recruitment step. As  
354 | observed for SOS<sup>Cat</sup> (Fig. 2c,d), the longer constructs also exhibited increased recruitment on  
355 | bilayers displaying RasGTP (Supplementary Fig. 3a).

356  
357 | Although the N-terminal domains inhibited initial recruitment, SOS<sup>DPC</sup> and SOS<sup>HDPC</sup> exhibited  
358 | extremely long dwell times on Ras functionalized bilayers (mean residency period in the hour  
359 | scale, Fig. 3c, Supplementary Fig. 3b,c and online Methods). The N-terminal domains thus  
360 | mediate two major functions: inhibition of initial recruitment probability and enhancement of the  
361 | dwell time in the active membrane bound state. This anti-correlation between membrane  
362 | recruitment probability and dwell time gives rise to an interesting dual functionality where rare  
363 | activation events are coupled to a potent response (Supplementary Fig. 3d,e).

### 364 | *Multi-component analysis of SOS-Ras-ERK signaling*

365  
366 | To establish the impact of intrinsic chemical SOS1 properties—as determined from reconstituted  
367 | SLB assays—on cellular SOS1-Ras signaling, we optimized a SOS1 and SOS2 double-deficient  
368 | (SOS1<sup>2</sup>) DT40 chicken B cell system that we used previously to characterize digital SOS1-Ras-  
369 | MAPK ERK signal transduction upon B cell receptor (BCR) ligation{Oh-hora, 2003 #59;Das,  
370 | 2009 #10;Jun, 2013 #37}. Here, we introduced EGFP-tagged variants of human SOS1 (hSOS1)  
371 | into these cells that are entirely devoid of endogenous SOS1-2, left cells unstimulated or induced  
372 | BCR ligation, and monitored EGFP-SOS localization by fluorescence microscopy or activation of  
373 | the ERK kinase using a phospho-ERK (pERK) antibody by flow cytometry{Jun, 2013 #37;Das,  
374 | 2009 #10} (Fig. 4a,b). Henceforth, we shall refer to the latter experimental platform as the p-  
375 | FLOW assay (online Methods). This assay reveals the quantitative magnitudes of Ras-ERK  
376 | responses at the individual cell level along with SOS1 expression levels. Figure 4c,d display 3D  
377

Deleted: , which we investigated next

Deleted: In the following experiments, SOS1 was presented with RasGDP on the bilayers in order to simulate the most abundant form of Ras in the cell.

Deleted: The

Deleted: of SOS1

Deleted: had a

Deleted: pronounced damping effect on initial membrane recruitment of SOS1

Deleted: 2c

Deleted: ;Tartaglia, 2007 #20

Deleted: 3c

Deleted: 4c

Deleted: 4c

Deleted: 4

Deleted: of SOS

Deleted: 5

Deleted: p-FLOW assay for m

Deleted: cell

Deleted: doubly

Deleted: y

Deleted: /

Deleted: and SOS2

Deleted: p

Deleted: (reporting Ras activation)

404 representations of such data mapping the time evolution of pERK after BCR stimulation as a  
405 function of SOS1 expression level. pERK traces corresponding to specific SOS1 levels represent  
406 two-dimensional slices through the data (Fig. 4f,g and 4i,j).

#### 407 *Timely signaling requires SOS<sup>Cat</sup>-flanking domains*

408  
409  
410 Transient transfection of EGFP-tagged full-length human SOS1 (SOS<sup>FL</sup>) rescued characteristic  
411 BCR-induced pERK patterns in SOS-deficient DT40 cells (Fig. 4b and Supplementary Fig.  
412 4a,b). SOS<sup>Cat</sup>, lacking the Grb2-binding domain as well as the N-terminal lipid-interacting  
413 domains, triggered Ras-ERK signaling patterns that differed substantially from those triggered by  
414 SOS<sup>FL</sup> (Fig. 4c,d and Supplementary Fig. 4c,d). Cells expressing high levels of SOS<sup>Cat</sup> exhibited  
415 more spontaneous activation of ERK in the absence of receptor stimulation than those with SOS<sup>FL</sup>  
416 (Fig. 4e,h). Even under these conditions, BCR stimulation further increased ERK activation in  
417 SOS<sup>Cat</sup> containing cells (Fig. 4c,f,i). Another notable difference was the signal attenuation. While  
418 SOS<sup>FL</sup>-induced pERK signals decreased at later time points following BCR stimulation (10-20  
419 min.), SOS<sup>Cat</sup> continued to signal in a sustained manner and SOS<sup>Cat</sup> outperformed SOS<sup>FL</sup> (Fig.  
420 4f,i). The sustained signaling from SOS<sup>Cat</sup> cells suggests the essentially irreversible membrane  
421 anchoring of SOS<sup>Cat</sup> observed in reconstituted assays may exist in cells as well, but not for SOS<sup>FL</sup>.

422  
423 At first glance, domains flanking SOS<sup>Cat</sup> might appear to merely dampen signal output. However,  
424 selective examination of cells expressing intermediary SOS levels revealed SOS<sup>FL</sup> signaled more  
425 efficiently than SOS<sup>Cat</sup> in response to BCR stimulation (Fig. 4g,j). Moreover, this intermediary  
426 SOS<sup>FL</sup> level resulted in rescue of pERK responses that were near identical to those observed for  
427 wild type DT40 cells, arguing that reconstitution with intermediary hSOS1 level matches the  
428 physiological level expressed in WT DT40 cells (Supplementary Fig. 4b). The data reveal that  
429 domains flanking SOS<sup>Cat</sup> have both positive- and negative- regulatory roles.

#### 431 *SOS autoinhibition prevents spontaneous activation*

432  
433 A number of structural and cellular studies established regulatory mechanisms that impact SOS1  
434 activity, but several proposed mechanisms appear contradictory {Sondermann, 2004  
435 #12;Gureasko, 2010 #5;Gureasko, 2008 #4;Yadav, 2010 #18}. To understand how SOS1 restricts  
436 spontaneous signaling in cells yet allows for controlled allosteric activation near the membrane  
437 interface, we first focused on SOS<sup>Cat</sup> flanking domains in the basal state (Fig. 5a-c), i.e., in resting  
438 cells {Groves, 2010 #42;Findlay, 2008 #41}.

439  
440 Addition of N-terminal domains to SOS<sup>Cat</sup> blocked the spontaneous activation of Ras-ERK in  
441 cells expressing high levels of SOS (Fig. 5a,b and Supplementary Fig. 5a-d). The inhibitory  
442 potential scales in an incremental manner with the number of domains flanking the catalytic core;  
443 i.e., SOS<sup>DPC</sup> signaling is more restrained than SOS<sup>Cat</sup> (Fig. 5a) and SOS<sup>HDPC</sup> is more inhibited than  
444 SOS<sup>DPC</sup> (Fig. 5b). These results corroborate the supported bilayer results in Figure 3b. Structural  
445 and biochemical studies on SOS1 demonstrated that the DH domain limits Ras-binding at the  
446 allosteric pocket and without removal of DH-mediated auto-inhibition and allosteric activation,  
447 the catalytic pocket cannot fully accommodate RasGDP nor dislodge GDP from  
448 Ras {Sondermann, 2004 #12;Gureasko, 2008 #4}. The HF strengthens SOS autoinhibition by  
449 blocking allosteric activation and by stabilizing a closed conformation of SOS {Gureasko, 2010  
450 #5;Sondermann, 2005 #65}. These structural findings agree with our p-FLOW results for the  
451 resting cell state (Fig. 5a-c). Of note, despite considerable effort, it has not been feasible to purify  
452 functional full-length SOS1 that includes the PR domain, preventing its examination in our earlier  
453 SLB assays {Iversen, 2014 #8}.

454

Deleted:

Deleted: *Timely activation and attenuation of Ras-ERK pathway requires domains flanking the catalytic core of SOS*

Deleted: ;

Deleted: 6a

Deleted: which lacks

Deleted: significantly

Deleted: ;

Deleted: 6c

Deleted: significantly

Deleted: c,

Deleted: e,

Deleted: h

Deleted: (Fig. 1c,d)

Deleted: 6b

Deleted: A

Deleted: ;

Deleted: *SOS<sup>Cat</sup>-flanking domains suppress spontaneous activation of Ras-ERK pathway*

Deleted: (See Supplementary Notes)

Deleted: The domains at the N-terminal side of SOS<sup>Cat</sup> have been credited with both positive and negative regulatory roles

Deleted: -

Deleted: performed a comprehensive characterization of the different SOS1 domains in resting or stimulated cells without the complication of contributions to Ras-ERK signaling from endogenously expressed SOS1 and SOS2 proteins. We

Deleted:

Deleted: , to understand the intramolecular autoinhibitory mechanisms that limit spontaneous membrane association and activation of SOS1

Deleted: 7a

Deleted:

493 The C-terminal PR domain is most noted for its positive regulatory role in connecting SOS to  
494 activated receptors via Grb2. Grafting only the PR domain onto SOS<sup>Cat</sup> revealed an inhibitory  
495 effect of this domain in restricting ligand-independent activation of SOS1 (Fig. 5c) that is  
496 independent of the autoinhibitory effect of the HF and DH-PH domains. The magnitude of  
497 inhibition conferred by the PR domain is comparable to that of the DH-PH domain relative to  
498 SOS<sup>Cat</sup> (Fig. 5a,c), demonstrating that the N- and C-terminal domains bestow similar potency to  
499 curb activity from the catalytic SOS<sup>Cat</sup> core in resting cells.

Deleted: {McCormick, 1993 #40}

#### 501 Positive regulation of SOS activity in stimulated cells

Deleted: SOS<sup>Cat</sup>-flanking domains p

Deleted: ly

Deleted: e

503 Next we investigated SOS1 regulation in BCR-stimulated cells expressing intermediary SOS1-  
504 EGFP levels (Fig. 5d-f). It has been reported that autoinhibition by the DH domain can be  
505 released by electrostatic interaction of the PH domain with membrane lipids, allowing allosteric  
506 Ras binding{Zhao, 2007 #17;Findlay, 2013 #7;Gureasko, 2008 #4}. In our p-FLOW assay we  
507 found that the DH-PH domain alone had a purely inhibitory effect relative to SOS<sup>Cat</sup> under  
508 conditions of BCR stimulation (Fig. 5d). Contrasting the addition of the DH-PH appendage,  
509 inclusion of the HF domain to SOS<sup>DPC</sup> resulted in increased signaling output (Fig. 5e). The  
510 positive regulatory role of HF after BCR stimulation was also observed for SOS containing the  
511 PR domain (Supplementary Fig. 5e-g). These findings are in agreement with the *in vitro*  
512 observation that HF enhances the residence time of membrane recruited SOS (Fig. 3c).

Deleted: under conditions of

Deleted: when

Deleted: s

Deleted: 7f

Deleted: unit

Deleted: appendage

Deleted: be

Deleted: ory for

Deleted: positive effect from

Deleted: /

Deleted: /

Deleted: /

514 For the DH-PH, our result from stimulated cells conflicted with the increased dwell time  
515 observed in the SLB assays (Fig 3c). The inhibitory effect of DH-PH is surprising because PH-  
516 lipid interaction has been reported to positively regulate GTP loading of Ras in COS-1 cells and  
517 in mouse embryonic stem cell differentiation{Zhao, 2007 #17;Findlay, 2013 #7;Gureasko, 2008  
518 #4}. This disparity may arise from the HF truncation counteracting the phospholipid binding of  
519 PH in the cell system. To test this, combined mutation of K456E and R459E (KR<sub>EE</sub> mutation)  
520 was introduced within the PH domain, disrupting PI(4,5)P<sub>2</sub>-PH interaction{Chen, 1997  
521 #15;Findlay, 2013 #7} and BCR-stimulated ERK activation was compared to wild-type SOS1  
522 variants (Fig. 5g-i). The KR<sub>EE</sub> mutation in DPC format had relatively small impact, resulting in  
523 a small decrease in pERK (Fig 5g). However, KR<sub>EE</sub> mutation in HDPC markedly antagonized  
524 SOS1 activation throughout the entire assay duration, supporting the requirement of HF to  
525 stabilize membrane-targeted SOS1 through phospholipid-PH interaction{Yadav, 2010 #18} (Fig  
526 5h). The KR<sub>EE</sub> HDPC signals comparable to the shorter WT DPC, negating the positive  
527 regulatory effect of HF domain (Fig 5i). These observations collectively indicate that lipid  
528 interaction through HF and PH domains co-operate to stabilize active SOS1 at the membrane.

Deleted: /

Deleted: 5h

529 In sum, p-FLOW results presented in Figure 5 combined with single molecule measurements in  
530 our SLB assays (Fig. 2,3) indicated that the flanking domains on both sides of SOS<sup>Cat</sup> have  
531 evolved to simultaneously dampen SOS activity in the basal state but enhance SOS activity upon  
532 receptor stimulation (further discussed in Supplementary Note 3).

Deleted: .

... [4]

Deleted: and Fig.

Deleted:

Deleted: indicates

#### 533 Regulation of super-processive SOS by endocytosis

534 SOS<sup>Cat</sup>, SOS<sup>DPC</sup>, and SOS<sup>HDPC</sup> are all highly processive in SLB assays and less sensitive to  
535 attenuation at late time points of induced signaling in cellular p-FLOW assays when compared to  
536 SOS<sup>FL</sup>. Interestingly, full-length (SOS<sup>FL</sup>) mimics these characteristics of SOS truncations when  
537 functionalized with a C-terminally grafted farnesylation signal sequence from H-Ras, which  
538 artificially targets SOS1 to the membrane (Supplementary Fig. 6){Aronheim, 1994 #56}.  
539 Deletion of the Grb2-binding domain of SOS1, its putative primary mode of membrane  
540 recruitment, thus produces a molecular and cellular phenotype resembling artificial membrane  
541 targeting.

Deleted: The various positive regulatory events under conditions of receptor stimulation suggest a "point-of-no-return" mechanism for active SOS molecules and we hypothesized that the PR domain is critical for an active form of SOS signal attenuation, which we investigated next.

Deleted: 8



574  
575 To further investigate membrane recruitment and subsequent trafficking of SOS1, we imaged  
576 SOS1-EGFP [in living cells](#), by TIRFM and spinning disc confocal microscopy. For this  
577 experiment, we employed the hybrid live cell-supported bilayer platform{Mossmann, 2005  
578 #23;Davey, 2012 #24;Balagopalan, 2011 #25;Grakoui, 1999 #89} to simulate the native signaling  
579 geometry of B cells interacting with antigen presenting cells (**Supplementary Fig. 7a**). SOS-  
580 deficient DT40 B cells expressing human SOS1-EGFP were spread on SLBs functionalized with  
581 antibody that recognizes and activates the BCR{Weber, 2008 #26}, in turn triggering activation  
582 of SOS{Brdicka, 2002 #63;Janssen, 2003 #62} (online Methods).

583  
584 B cell activation from the supported membrane led to formation of BCR microclusters, here  
585 observed by TIRFM imaging of a Cy5 label on the antibody (**Fig. 6a**). SOS<sup>FL</sup> was efficiently  
586 recruited to sites of BCR clusters whereas SOS<sup>cat</sup> did not colocalize with BCR clusters although it  
587 localizes to the membrane, presumably on the basis of binding to allosteric Ras (**Fig. 6a,b**).  
588 SOS<sup>HDPC</sup> also lacked colocalization with the BCR clusters (**Fig. 6b** and **Supplementary Fig. 7b**).  
589 [Contrasting reports have addressed the role of signaling complexes and SOS1 function](#). [In our B](#)  
590 [cell system devoid of any endogenous SOS expression, chimeric SOS<sup>HDPC</sup>-SH2, with a single SH2](#)  
591 [domain of Grb2 grafted onto SOS<sup>HDPC</sup>, did not colocalize with sites of BCR microclusters \(Fig.](#)  
592 [6b and Supplementary Fig. 7b\)](#). Conversely, addition of the PR domain to SOS<sup>cat</sup> or to SOS<sup>DPC</sup>  
593 enabled SOS1-BCR colocalization (**Fig. 6b**, **Supplementary Fig. 7b**, **Supplementary Note 4**).

594  
595 Over time, the initially scattered BCR clusters concatenated and moved toward the center of the  
596 synapses formed between the B cells and the SLB. About 15-20 minutes after cell landing, a large  
597 central cluster appeared, a phenomenon commonly referred to as ‘BCR capping’{Pierce, 2010  
598 #90} (**Fig. 6c** and **Supplementary Movie 1**). SOS<sup>FL</sup> initially moved with the activated BCR, but  
599 at later time points we found that it was depleted from the central BCR cluster (**Fig. 6d,e**). Thus,  
600 SOS<sup>FL</sup> leaves the plasma membrane at the site of the central BCR cluster, which also correlates  
601 with attenuation of SOS<sup>FL</sup>-driven Ras-ERK signaling at later time points (**Fig. 4g**). Confocal  
602 fluorescence microscopy revealed the appearance of punctate SOS structures located inside the  
603 cells, reminiscent of endocytic vesicles (**Fig. 7a**). Moreover, these vesicle-like structures  
604 appeared only for SOS<sup>FL</sup> but not for SOS<sup>HDPC</sup> or the chimeric SOS<sup>HDPC</sup>-SH2 and only on bilayers  
605 displaying the BCR activating antibody (**Fig. 7a,b**). These observations suggest that removal of  
606 SOS1 from the membrane in a BCR signal dependent process requires the C-terminus.

607  
608 To more definitively address disappearance of SOS<sup>FL</sup> from the plasma membrane, we utilized  
609 COS-1 cells with a much larger cytoplasm compared to DT40 B cells. Visualizing transfected,  
610 EGFP-tagged SOS<sup>FL</sup> revealed predominantly cytoplasmic and evenly distributed SOS1 prior to  
611 EGF (Epidermal Growth Factor) stimulation. [We observed prominent](#) membrane-recruitment of  
612 SOS1 at the plasma membrane 10 min. after EGF stimulation. By 30 min post-stimulation, most  
613 SOS molecules localized to perinuclear, vesicular structures (**Fig. 7c**). The vesicular SOS1  
614 colocalized with the early endosomal marker protein Rab5{Stenmark, 2009 #91}, indicating that  
615 SOS1 molecules are removed from the plasma membrane via endocytosis (**Fig. 7d**). We [found](#)  
616 that the kinetics of SOS1 endocytosis were influenced by the allosteric Ras binding pocket. A  
617 SOS1 mutant impaired in allosteric Ras binding (SOS<sup>FL-L687E R688A</sup>) exhibited accelerated  
618 endocytosis (**Fig. 7e**). Binding of SOS1 to Ras via its allosteric pocket thus appears to counteract  
619 endocytosis of SOS1.

## 622 Discussion

623

Deleted: constructs

Deleted: live cell combined

Deleted: 9a

Deleted:

Deleted: 9b

Deleted: (See Supplemental Notes)

Deleted: 9

Deleted: and

Deleted: 9b

Deleted: It has previously been shown that grafting a single SH2 domain of Grb2 to SOS<sup>HDPC</sup> (SOS<sup>HDPC</sup>-SH2 construct) can rescue certain ES cell fate decisions<sup>64</sup> and ERK activation in T cells<sup>64</sup>. On the other hand, additional reports have shown that multivalent SOS1-Grb2 is necessary for efficient assembly of LAT signaling clusters<sup>65</sup>, and induction of related signaling processes<sup>64,66</sup>, downstream of the T cell receptor (TCR)<sup>65</sup> while TCR clustering takes place independently of SOS1-Grb2<sup>64</sup>. Reminiscent of this observation, in our B cell system devoid of any endogenous SOS expression, chimeric SOS<sup>HDPC</sup>-SH2 did not colocalize with sites of BCR microclusters (**Fig. 6b** and **Supplementary Fig. 9b**) further indicating that the PR domain in SOS is critical for colocalization with the BCR and that this function can not be substituted by simply grafting Grb2's SH2 domain onto SOS<sup>HDPC</sup>.

Formatted: Font color: Auto

Deleted: fibroblast-like

Deleted: Prominent

Deleted: was observed

Deleted: observed

Deleted:

Deleted: Our results corroborate the commonly accepted view that the Grb2 interacting PR domain of SOS mediates localization to receptor induced signaling clusters at the plasma membrane. More surprisingly, the same interactions that facilitate this recruitment effect also curb SOS activity in the resting state in unstimulated cells and mediate endocytosis of the activated SOS at later time-points of the signaling process. We propose that these three roles of the PR domain lends switch-like behavior to SOS, functioning as a timer for the activated SOS and thus providing a mechanism by which the cell can regulate the super-processive active membrane-bound state revealed by our single molecule experiments *in vitro*.

675 Signal propagation from receptors to the Ras pathway is commonly accepted to involve  
676 recruitment of SOS from the cytosol to the plasma membrane via the adaptor protein Grb2. In its  
677 classical interpretation, the increased membrane localization of SOS is presumed to tip the  
678 RasGEF-RasGAP balance at the membrane in favor of Ras activation, thus explaining how  
679 signals are relayed downstream. However, several results have challenged this classical model,  
680 led by the recurring observation that SOS truncations lacking the Grb2-binding PR domain  
681 remain signaling competent in cells{Karlovič, 1995 #54;Corbalan-Garcia, 1998 #3;McCollam,  
682 1995 #53;Wang, 1995 #55;Zhao, 2007 #17;Roose, 2007 #64}. More recently, we have shown  
683 that SOS can stably associate with a lipid membrane surface by engaging Ras at the allosteric  
684 binding pocket. In reconstituted membrane systems, this mechanism alone (i.e., independent of  
685 other mechanisms of SOS membrane anchoring) is sufficient for sustained association of SOS  
686 with the membrane where it can processively activate thousands of Ras molecules{Iversen, 2014  
687 #8}. **Strikingly**, essentially no dynamic equilibrium is observed; membrane recruitment of SOS is  
688 quasi-irreversible at signaling relevant timescales.

Deleted: /

Deleted: Significantly

690 Here we have demonstrated that membrane recruitment probability of SOS by allosteric Ras is  
691 strongly accelerated by RasGTP relative to RasGDP. This explains how SOS constructs lacking  
692 the Grb2 binding PR domain are capable of sensing receptor triggering. In a cellular context  
693 RasGTP levels are primed following receptor activation, e.g., due to the activity of RasGRP or  
694 other exchange factors, which will produce RasGTP and ignite SOS recruitment, fuelled by  
695 strong positive feedback as recruited SOS produces increasingly more RasGTP. This ability to  
696 respond to receptor stimuli, independently of Grb2, is further augmented by the lipid interacting  
697 PH and HF domains that bind lipidic second messengers such as  $\text{PIP}_2$  and PA.

Deleted: s

698 In light of the spontaneous and nearly irreversible activating characteristics of SOS, the question  
699 shifts to how receptor-mediated signals maintain control of SOS via Grb2 binding. The literature  
700 abounds with apparently conflicting results on this matter. In particular, it has been unclear  
701 whether the C-terminal PR domain plays a positive, redundant or even negative regulatory role in  
702 SOS signaling. Our p-FLOW assay, which considers the multi-factorial aspects of signal  
703 transduction (i.e., expression level, pathway activity and time after receptor stimulation), revealed  
704 that the PR domain performs dual functions in receptor-stimulated cells, acting as a signal  
705 facilitator or signal terminator, depending on the phase of the signaling process. In addition, the  
706 PR domain contributes to inhibition of SOS in the basal state.

Deleted: ; . The mechanism of inhibition can only be speculated at this stage due to lack of a full-length SOS structure

Deleted: Possibly, the C-terminus sterically limits the accessibility of the catalytic REM-CDC25 module in analogy to the obstruction exerted by the N-terminus. Alternatively, the C-terminus might provide a binding surface for interacting proteins that inhibit SOS.

707 From the perspective of receptor-mediated activation of SOS, Grb2 binding by the PR domain  
708 clearly increases the rate of activation. Our multi-parameter mapping of SOS-Ras-ERK cascade  
709 activity, enabled by reconstitution of SOS1 in SOS-deficient B cells, reveals that spontaneous  
710 activation of SOS scales with SOS expression level. Essentially, the spontaneous activation of  
711 SOS is driven by Le Chatelier's principle and is simply a probabilistic event that scales with  
712 concentration. Under endogenous expression levels, this spontaneous activation must be  
713 sufficiently slow as to be inconsequential in the context of background GAP activity, thus  
714 requiring the additional boost from receptor-mediated Grb2 recruitment to trigger a productive  
715 Ras signal (see [Supplementary Note 5](#) for an extended discussion and [Supplementary Fig. 8a-d](#)). We propose endocytosis as a method of signal attenuation, providing an actively regulated  
716 mechanism to remove SOS from the plasma membrane, effectively cutting off access to new Ras  
717 molecules. SOS constructs lacking the PR domain fail to get endocytosed and exhibit sustained  
718 ERK activation levels (further discussed in [Supplementary Note 6](#)). Thus, in its natural state,  
719 SOS activation follows a one-way trafficking circuit with active removal from the membrane via  
720 the PR domain as the shut down mechanism.  
721

Deleted: .

Historically, there has been considerable considerable discussion regarding the possibility of Ras activation at endomembranes<sup>80</sup> although more recent reports conclude that Ras activation is indeed confined to the plasma membrane<sup>81-83</sup>. This view is further corroborated by a newly released study showing that Ras activation downstream of the EGFR is strictly localized to the plasma membrane at physiological Ras expression levels<sup>84</sup>. In this work it was further shown that Ras activation at endocytic vesicles takes place only in an overexpression scenario<sup>84</sup>. We cannot rule out that some minor degree of Ras activation takes place also at endocytic vesicles in our system. Nevertheless, it should be noted that Ras activation at endomembranes is not per se conflicting with our main conclusion of endocytosis as a fundamental regulatory mechanism in SOS signaling.

Deleted: therefore

756 | Recently, it has become clear that single amino acid variants in RasGEFs can have a profound  
757 | biological effect. We established that the EF hands in RasGRP1 play a dual role in keeping this  
758 | RasGEF in the autoinhibited state while simultaneously allowing for calcium-induced  
759 | activation{Iwig, 2013 #92}. A single amino acid variant allele, *Rasgrp1<sup>Anae1</sup>*, with a point-mutated  
760 | EF hand perturbs both regulatory roles of this domain and leads to autoimmune features in  
761 | *Rasgrp1<sup>Anae1</sup>* mice{Daley, 2013 #93} . The structural basis for PR domain-facilitated  
762 | autoinhibition and the transition to the activated state of SOS is unknown, since efforts to produce  
763 | functional full length SOS1 protein including the PR domain have been unsuccessful to date.  
764 | Mining public databases, we find several *SOS1* variants with point mutations or stop codons in  
765 | the PR domain linked to Noonan developmental syndrome, hyperplastic syndromes such as  
766 | hereditary gingival fibromatosis{Rojas, 2011 #94}, and various cancers (**Supplementary Fig.**  
767 | **8e**). It is plausible that subtle point mutations in the PR domain may have significant biological  
768 | effects and contribute to human disease.

769 |  
770 | **Note:** Supplementary information including [8 figures](#), [7 Supplementary Notes](#) and a movie is  
771 | available online.

### 772 | [Acknowledgments](#)

773 | [The authors thank the Roose-, Groves-, Kuriyan-, and Bar-Sagi- lab members for helpful](#)  
774 | [comments and suggestions. The authors thank J. Kuriyan for insightful comments on the](#)  
775 | [manuscript. Also, the authors thank W. C. Lin and L. Iversen for assistance with initial supported](#)  
776 | [lipid bilayer experiments.](#)

777 | [The research was supported by a P01 Program grant from NIH-NIAID \(AI091580 – to J.P.R. and](#)  
778 | [J.T.G.\). Further support came from R01-CA187318 NIH-NCI and R01-AI104789 \(both to J.P.R.\)](#)  
779 | [and an ARRA stimulus supplement GM078266 \(D.B.-S., K.K.Y.\) as well as a grant from the](#)  
780 | [Danish Council for Independent Research, Natural Sciences \(S.M.C.\).](#)

### 781 | **Author contributions**

782 | SMC, HLT, JEJ performed experiments and analyzed data. SA, MT assisted with live cell  
783 | experiments. JI purified proteins. KY performed COS1 cell experiments under supervision of  
784 | DBS. JTG, JPR, SMC, HLT, JEJ conceptualized and designed experiments. SMC, HLT, JEJ,  
785 | JPR & JTG wrote the paper. JTG, JPR supervised the project. All authors discussed and  
786 | commented on the results.

### 787 | [Competing financial interests](#)

788 | [The authors declare no competing financial interests.](#)

## 792 | [Figure Legends](#)

793 |  
794 |  
795 | **Figure 1.** The catalytic core of SOS is stably and functionally recruited to Ras-decorated  
796 | supported lipid bilayers *in vitro*, independently of Grb2 and lipid binding domains.

**Deleted:** Historically, there has been considerable discussion regarding the possibility of Ras activation at endomembranes<sup>80</sup> although more recent reports conclude that Ras activation is indeed confined to the plasma membrane<sup>81-83</sup>. This view is further corroborated by a newly released study showing that Ras activation downstream of the EGFR is strictly localized to the plasma membrane at physiological Ras expression levels<sup>84</sup>. In this work it was further shown that Ras activation at endocytic vesicles takes place only in an overexpression scenario<sup>84</sup>. We cannot rule out that some minor degree of Ras activation takes place also at endocytic vesicles in our system. Nevertheless, it should be noted that Ras activation at endomembranes is not per se conflicting with our main conclusion of endocytosis as a fundamental regulatory mechanism in SOS signaling. -

**Deleted:** The PR domain of SOS also plays a dual role; in the basal state, i.e. in resting lymphocytes, the PR domain cooperates with the N terminal of SOS to maintain the autoinhibited state.

**Deleted:** 9e

**Deleted:** Interestingly, these pathological alterations in the C terminus would disturb one or more of the PxxP motifs that mediate the interaction of SOS with Grb2. Given the three roles of the PR domain that we revealed,

**Deleted:** i

**Deleted:** 10

**Deleted:** oh

**Deleted:** n

**Deleted:** an

**Deleted:** hen

**Deleted:** ars

**Deleted:** — Page Break —

**Deleted:** s

**Deleted:** Figure 1 . ... [5]

**Deleted:**

845  
846 (a) The domain architecture of full-length (FL) human SOS1 (hSOS1). The catalytic unit (Cat) is  
847 depicted together with the flanking regulatory domains. Yellow boxes in the C-terminal proline  
848 rich (PR) domain indicate PxxP motifs known to interact with Grb2.

849  
850 (b) Classical model of SOS-Ras-ERK signal transduction pathway. In the shown example, SOS is  
851 recruited to the plasma membrane downstream of activated B cell receptor via binding of Grb2 to  
852 phosphotyrosine motifs on the adaptor protein LAB.

853  
854 (c) Single SOS activity assay based on micro-patterned Ras functionalized fluid supported lipid  
855 bilayers.

856  
857 (d) Representative overlay image of fluorescent GDP bound to Ras (red channel) and membrane-  
858 recruited SOS<sup>Cat</sup> (green channel) in the single molecule assay depicted in c. Membrane corrals  
859 where individual copies of SOS<sup>Cat</sup> were recruited have depleted signal and appear darker in the  
860 GDP channel, demonstrating highly processive SOS<sup>Cat</sup> activity (i.e., recruited SOS activates Ras  
861 in a sustained manner without dissociating from the membrane surface). [The particular](#)  
862 [experiment was repeated five times.](#)

863  
864  
865 **Figure 2. Stopped flow supported lipid bilayer assay probing SOS recruitment and**  
866 **desorption.**

867  
868  
869 (a) Cartoon representation of the two phases of the assay.

870  
871 (b) Single molecule tracking of ATTO647N labeled SOS<sup>Cat</sup> diffusing at the bilayer.

872  
873 (c) Traces from the stopped flow assay. In addition to SOS<sup>Cat</sup> the panel shows experiments with  
874 SOS<sup>Cat-W729E</sup>, a mutant with an abolished allosteric pocket, and Ras<sup>Y64A</sup>, a construct deficient in  
875 binding to the active site of SOS. The indicated counts are for a field of view of 55x55 μm<sup>2</sup> and  
876 were scaled by taking into account the applied ratio of unlabeled to labeled enzymes.

877  
878 (d) Membrane recruitment probabilities quantified from phase 1 of the stopped flow assay. Each  
879 triangle represents data from a SLB sample. Black horizontal lines indicate the average of the  
880 data shown for each condition.  
881 [Source data for plots and graphs are available online.](#)

882  
883  
884  
885  
886 **Figure 3. N-terminus of SOS is suppressing bilayer recruitment while prolonging dwell time**  
887 **in the active membrane bound state.**  
888

**Deleted:** Chromium diffusion barriers confine single molecules of recruited SOS to corrals displaying thousands of bilayer coupled Ras. SOS activity is probed by following the exchange of a fluorescent GDP analog (GDP-ATTO488), initially loaded on Ras, for unlabeled GTP.

**Deleted:** ed

**Deleted:** -

**Deleted:** Figure 2 .

**Deleted:** In phase 1, a flow cell integrated H-Ras functionalized supported bilayer is subjected to a pulse of fluorescently labeled SOS, in the absence of nucleotide in solution, leading to capture of SOS at the bilayer upon binding of Ras at the allosteric and catalytic sites. In phase 2, nucleotide exchange commences upon chasing with GDP/GTP and dissociation of SOS is followed as the exchange reaction progresses. -

**Deleted:** Directly counting the number of SOS at the bilayer permits quantification of recruitment and desorption kinetics.

**Deleted:** . Labeled and unlabeled SOS was mixed at an appropriate ratio to allow accurate counting of the number of SOS at the bilayer via single molecule tracking. The total injected SOS concentration was always 100 nM (here and in following experiments). The indicated counts

**Deleted:** Recruitment was quantified as the probability of SOS binding to Ras upon collision of a single SOS and a membrane-bound Ras protein (see online Methods).

**Deleted:** bar

**Deleted:** the average of data

**Deleted:**

**Deleted:** collected at two

**Deleted:** s, except Ras-SOS<sup>Cat</sup>-GDP that represents four samples. For each SLB sample data were collected for at least 15 different positions.

**Deleted:** Error bars represent SEM.

**Deleted:** Figure 3 .

933 (a) SOS constructs tested in the stopped flow supported bilayer assay. All experiments shown  
934 were conducted with RasGDP on the bilayer.

935  
936 (b) Recruitment probability of SOS constructs obtained from the stopped flow assay. Each bar  
937 represents the average of data collected at N SLB samples, [except for HDPC where each bar](#)  
938 [reflects data from one SLB](#): SOS<sup>Cat</sup> N=4, DPC N=4, HDPC N=2, HDPC(R552G) N=3. Each  
939 sample was imaged at least at 15 different positions. Error bars represent SEM. (data for SOS<sup>Cat</sup>  
940 are re-plotted from **Figure 2** for comparison).

941  
942 (c) Membrane residence time of SOS constructs obtained from the stopped flow assay. The  
943 mean residency period for each construct was obtained by fitting desorption traces  
944 (**Supplementary Fig. 3a**, N SLB samples: SOS<sup>Cat</sup> N=5, DPC N=4, HDPC N=2, HDPC(R552G)  
945 N=3). Error bars indicate [estimated standard deviation](#) on the fit coefficient for an average over  
946 the indicated samples.

947 [Source data for plots and graphs are available online.](#)

948

949

950 **Figure 4. Multi-parameter assay of SOS-RAS-ERK pathway activity reveals functional**  
951 **significance of SOS flanking domains in cell signaling context.**

952

953 (a) p-FLOW assay of phospho-ERK (pERK) in transiently transfected SOS1-2- DT40 B cells.

954

955 (b) Multi-parameter analysis of SOS-RAS-ERK pathway in model B cells expressing full-length  
956 hSOS1 (SOS<sup>FL</sup>) C-terminally fused to an EGFP label.

957

958 (c-d) BCR-induced SOS-RAS-ERK pathway activation as a function of increasing SOS  
959 expression level and time after stimulation of BCR for SOS<sup>Cat</sup>- and SOS<sup>FL</sup>-expressing cells.  
960 Arrow heads indicate the time of BCR activation. pERK level is reported as mean fluorescence  
961 intensity (MFI).

962

963 (e) Comparison of basal pERK level across increasing protein concentration of SOS<sup>Cat</sup> and SOS<sup>FL</sup>.  
964 The yellow plane on the cube indicates the subspace of the 3D parameter space of the assay  
965 corresponding to the shown traces.

966

967 (f-g) Comparative plots representing the dynamic change in BCR-induced pERK as a function of  
968 stimulation time in cells expressing super-physiological level (f) and intermediate level of SOS  
969 (g).

970

971 (h-j) Ratio's of pERK observed in SOS<sup>Cat</sup> and SOS<sup>FL</sup>-transfected cells corresponding to traces on  
972 panels e-g. Red fill indicates increased activity of SOS<sup>Cat</sup> as compared to SOS<sup>FL</sup> whereas blue fill  
973 highlights decreased relative activity. Data are based on seven [independent cell cultures and p-](#)  
974 [FLOW experiments](#). Error bars represent SEM.

975 [Source data for plots and graphs are available online.](#)

976

Deleted: 4

Deleted: the

Deleted: error

Deleted: .

Deleted: —Page Break—

... [6]

Deleted: Transiently transfected cells were stimulated with anti-BCR and fixed/permeabilized/stained for intracellular pERK at indicated time points. EGFP expression level was simultaneously recorded as a readout of SOS concentration. Analyzed cells were split into 9 sub-populations (minimum 100 cells in each) based on equal interval binning of the EGFP signal. The same binning of the SOS-EGFP axis was applied across all analyzed SOS constructs.

Deleted: biological replicates

996 | **Figure 5. SOS<sup>Cat</sup> flanking domains block spontaneous activation in basal state but promote**  
997 | **RAS-ERK signal transduction following receptor stimulation.**

999 | (a,b,c) Addition of SOS<sup>Cat</sup>- flanking domains inhibits spontaneous activation of ERK in the p-  
1000 | FLOW assay: DH-PH domain (a), HF domain (b) and PR domain (c) (depicted schematically in  
1001 | domain diagrams at the top). The ratio of pERK MFI for longer to shorter SOS variants is plotted  
1002 | against increasing SOS concentration for unstimulated cells (basal state).

1004 | (d,e,f) Time dependence of pERK MFI ratio after BCR stimulation is plotted for indicated  
1005 | constructs: DH-PH domain (d), HF domain (e), and PR domain (f) (depicted schematically in  
1006 | domain diagrams at the top).

1008 | (g,h,i) BCR-induced ERK activation is compared between KR<sub>EE</sub> PH domain mutant against  
1009 | indicated wild-type SOS1 variants. The K456E R459E (KR<sub>EE</sub>, \*\*) mutation disrupts membrane  
1010 | lipid interaction mediated by PH domain.

1012 | Yellow planes on the cubes to the left indicates the corresponding subspace of the 3D parameter  
1013 | space in the p-FLOW assay (c.f., Fig. 4c,d). Data are based on three independent experiments.  
1014 | Error bars represent SEM.

1015 | [Source data for plots and graphs are available online.](#)

1016 | Deleted: —————Page Break—————

1017 | Deleted: Figure 6 . ... [8]

1018 | Formatted: Font:(Default) Times, 11 pt, Bold

1019 | **Figure 6 PR domain dependent localization of SOS to BCR microclusters and SOS**  
1020 | **depletion from the central BCR cluster formed between B cells and supported lipid bilayers**  
1021 | **decorated with BCR crosslinking antibody.**

1023 | (a) Representative TIRFM images illustrating spatial localization of SOS<sup>FL</sup> and BCR  
1024 | microclusters. The panel shows, respectively, a cell expressing SOS<sup>Cat</sup> (left) and SOS<sup>FL</sup> (right) at  
1025 | early (~5 min.) time point after contacting the bilayer. [See \(b\) for number of replications.](#)

1027 | (b) Colocalization of different SOS variants and BCR microclusters. Each dot on the graph  
1028 | represents data from one cell. [Red horizontal lines indicate average ± SEM for the shown scatter](#)  
1029 | [data.](#) N cells; N SLB samples: SOS<sup>Cat</sup> 31;5, HDPC 29;2, HDPC-SH2 34;2, 29;2 FL 21;2,  
1030 | FL(R552G) 16;2, SOS<sup>Cat</sup>-PR 9;2, DPC-PR 32;1.

1032 | (c) Overlay of anti-BCR (cy5, red) and SOS (EGFP, green) fluorescence signal before (left) and  
1033 | after (right) the formation of a central BCR cluster. The displayed overlays are also plotted as  
1034 | separate image channels in **Supplementary Figure 7c.**

1036 | (d) Trajectories of BCR (red) and SOS<sup>FL</sup> (green) movement at the cell-bilayer interface. The  
1037 | trajectories were obtained by tracking individual BCR and SOS clusters in a time-lapse (Movie  
1038 | S1) of the cell shown in (c). Each tracked position of a microcluster is indicated by a dot. Chains  
1039 | of connected dots draw out microcluster trajectories.

1041 | (e) Normalized time-traces of the fluorescence intensity of SOS<sup>FL</sup>-EGFP and BCR at the center of  
1042 | the cell-supported bilayer synapse for the cell shown in c. The phenomenon of SOS depletion  
1043 | from the central BCR cluster was observed for 69% of SOS<sup>FL</sup> expressing cells (95 cells imaged  
1044 | over 5 experiments).

1045 | [Source data for plots and graphs are available online.](#)

Moved (insertion) [1]

Deleted: R

Deleted: /

Deleted: bioreplicates

Deleted: /

Moved up [1]: Red lines indicate average ± SEM.

Deleted: 9

1070  
1071  
1072  
1073  
1074  
1075  
1076  
1077  
1078  
1079  
1080  
1081  
1082  
1083  
1084  
1085  
1086  
1087  
1088  
1089  
1090  
1091  
1092  
1093  
1094  
1095  
1096  
1097

**Figure 7. PR domain dependent SOS endocytosis mediates signal attenuation.**

(a) Confocal data in 3D rendering showing SOS<sup>FL</sup>-enriched vesicle-like structures appearing away from the cell-bilayer contact zone at late time points ( $\approx$ 10-30 min. after cell landing). [Bar: 3  \$\mu\$ m.](#)

(b) Statistics of cells displaying internal SOS puncta as shown in a. N cells; N SLB samples; N cell cultures: FL 97;4:2, HDPC 75;3:2, HDPC-SH2 78;3:2. Error bars indicate SD over the different SLB samples.

(c) Localization of EGFP-tagged full length SOS1 in COS-1 cells stimulated with EGF for the indicated time points. [Bar: 10  \$\mu\$ m.](#)

(d) Colocalization of internalized SOS1 with the Rab5 endosomal marker in COS-1 cells stimulated for 25 minutes with EGF. Images shown are representative of colocalization pattern observed in >75% of the cells in 3 independent experiments (25 cells analyzed per experiment). The enlarged inset in the merge is also plotted in **Supplementary Figure 7d** as separate image channels. [Bar: 10  \$\mu\$ m.](#)

(e) Kinetics of SOS localization to endocytic vesicles in EGF stimulated COS-1 cells. EGFP-tagged SOS<sup>FL</sup> is compared to a full length SOS1 molecule with a functionally impaired allosteric pocket (SOS<sup>FL-L687E, R688A</sup>). Representative images accompany the bar graph. The results represent an average of two independent experiments (25 cells counted per condition for each experiment). [Bar: 10  \$\mu\$ m.](#)  
[Source data for plots and graphs are available online.](#)

Deleted: /

Deleted: bioreplicates

Deleted: /

Deleted: /

Deleted: /

Deleted: 9

Deleted: d

1105 **online Methods**

1106

1107 **Proteins and reagents**

1108 H-Ras<sup>C118S,C181</sup> (H-Ras construct containing residues 1-181 with a single cysteine at position C181  
1109 used for coupling to the bilayer, henceforth simply H-Ras), SOS<sup>Cat</sup> cys-lite (residues 566-1049  
1110 with following mutations: C838A, C635A, C980S, E718C), SOS<sup>DPC</sup> (residues 198-1049),  
1111 SOS<sup>HDPC</sup> (residues 1-1049), and SOS<sup>HDPC(R552G)</sup> (residues 1-1049 with R552G) of human SOS1  
1112 were expressed in *E. Coli* and purified as previously described{Gureasko, 2008 #4}. Lipids were  
1113 purchased from Avanti (Alabaster, AL). TR-DHPE, BODIPY-GDP and BODIPY-GTP were  
1114 purchased from Invitrogen (Carlsbad, CA). ATTO 647N-maleimide, ATTO 488-labeled  
1115 guanosine diphosphate (EDA-GDP-ATTO 488) and EDA-GppNp-ATTO 488 (non-  
1116 hydrolyzeable analog of guanosine triphosphate) were purchased from Jena Bioscience (Jena,  
1117 Germany). Guanosine triphosphate (GTP) was purchased from Sigma-Aldrich (Saint Louis, MO)  
1118 and guanosine diphosphate (GDP) was purchased from MP biomedical (Santa Ana, CA).  
1119 Biotinylated anti-Chicken IgM was purchased from Sigma (#SAB3700240) and Cy5 labeled  
1120 streptavidin was from Life Technologies (#43-4316).

1121 **Protein labeling and benchmarking**

1122 SOS constructs were fluorescently labeled by reacting 1:10 molar ratio of unlabeled protein with  
1123 Atto647N-maleimide for 2 hours at 23°C. Unreacted fluorophores were removed using PD-10  
1124 columns (GE Healthcare). The degree of labeling was determined by UV-Vis spectroscopy  
1125 (NanoDrop 2000, Thermo Scientific) yielding: 90% for SOS<sup>Cat</sup> cyslite, 119% for SOS<sup>DPC</sup>, 106%  
1126 for SOS<sup>HDPC</sup> and 118% for SOS<sup>HDPC(R552G)</sup>. SOS<sup>DPC</sup>, SOS<sup>HDPC</sup> and SOS<sup>HDPC(R552G)</sup> harbored multiple  
1127 cysteines, explaining why labeling efficiencies exceeded 100%.  
1128 Dye labeling can potentially alter protein behavior and caution is always needed in interpretation  
1129 of related results. Here, nucleotide-exchange experiments were conducted to ascertain that  
1130 labeling did not alter enzyme behavior; comparison of unlabeled and labeled constructs in the  
1131 stopped-flow assay indicated that labeling had negligible effect on the *in vitro* activity of SOS in  
1132 our system (**Supplementary Fig. 1c**).

1133 **Ras-decorated supported lipid bilayers for *in vitro* assays**

1134 Ras decorated bilayers were prepared as previously described (ref. {Gureasko, 2008  
1135 #4;Iversen, 2014 #8}). Lipids dissolved in chloroform were mixed in a round-bottomed flask.  
1136 Solvent was evaporated by rotary evaporation (40°C, 10 min.) followed by N<sub>2</sub> flow (20 min.).  
1137 Small unilamellar vesicles (SUVs) were formed by rehydrating the dried lipid film in PBS (pH  
1138 7.45). The vesicle suspension was extruded 11 times (Avestin miniextruder, 30 nm pore diameter  
1139 polycarbonate membranes; Millipore, Billerica, MA). Lipid composition was 3% DOPS, 3%  
1140 MCC-DOPE, 0.01% TxRed-DHPE and the balance amount of Egg-PC.  
1141 Supported lipid bilayers (SLBs) were formed by incubating the SUV suspension for 30 min. on  
1142 cleaned piranha-etched glass slides mounted in flow chambers (FCS2 flow chambers, Biopetech).  
1143 The sample was then incubated with Casein in PBS (2.5 mg/ml) for 10 min., followed by 2.5  
1144 hours incubation with H-Ras in PBS (1 mg/ml). Following Ras incubation, unreacted MCC was  
1145 quenched by treating the sample with 2-beta-mercaptoethanol in PBS (5mM) for 10 minutes. A  
1146 motorized syringe pump (PHD 2000, Harvard Apparatus) was used throughout the sample  
1147 preparation for liquid injections and washing steps.  
1148 For loading fluorescent nucleotide onto Ras samples were equilibrated at 4°C and washed with 3  
1149 mL loading buffer (40mM HEPES, 150mM NaCl, pH 7.4); the native nucleotide bound to Ras  
1150 was stripped by 20 min. incubation with EDTA in loading buffer (50mM EDTA, 40mM HEPES,  
1151 150mM NaCl, pH7.4). This step was immediately followed by overnight incubation of samples

Deleted: /

Deleted: 2

Deleted: /

Deleted: /



1156 with 10  $\mu$ M fluorescent nucleotide analogue in reaction buffer (40mM HEPES, 100mM NaCl,  
1157 5mM MgCl<sub>2</sub>, pH7.4). Fluorescent nucleotides used in this study included Bodipy-GDP, Bodipy-  
1158 GTP, Atto488-GDP, and Atto488-GppNp. A control experiment where samples underwent all  
1159 steps except Ras incubation showed no detectable non-specific binding of the applied fluorescent  
1160 nucleotides to the SLB.

1161 Immediately prior to microscopy, samples were brought to room temperature and any unbound  
1162 fluorescent nucleotide was removed by washing with 3 mL reaction buffer (40mM HEPES,  
1163 100mM NaCl, 5mM MgCl<sub>2</sub>, 1 mM TCEP, pH7.4) under constant flow. The two-dimensional  
1164 fluidity of lipids and Ras was confirmed for each sample using fluorescence recovery after  
1165 photobleaching (FRAP).

#### 1166 **Antibody-functionalized supported lipid bilayers for live cell imaging**

1167 Bilayers for live-cell experiments were prepared as described above with a lipid composition of  
1168 5% DOPS, 0.1% Biotinyl Cap PE, 0.005% TxRed-DHPE and the balance amount of Egg-PC. A  
1169 piranha-etched glass slide (#1, Fisher Scientific) mounted in a microscopy chamber (A-7816, Life  
1170 Technologies) was incubated with SUV suspension (1mg/mL) for 30 min.. The sample was then  
1171 treated with Cy5 labeled streptavidin (18.8 nM) for 30 min., followed by another incubation with  
1172 biotinylated anti-chicken IgM (62 nM; SAB3700240, Sigma) for 30 minutes. Each incubation  
1173 step was followed by copious washing with PBS.

#### 1174 **Stopped flow supported lipid bilayer assay**

1175 Labeled and unlabeled SOS constructs were mixed at desired ratio (typically 1:20) at a total  
1176 concentration of 100 nM and flowed over the bilayer as a transient pulse. The number of labeled  
1177 SOS molecules remaining on the bilayer after the pulse (due to capture by catalytic Ras in the  
1178 absence of free nucleotide{Bos, 2007 #2;Corbalan-Garcia, 1998 #3}) was counted at the single  
1179 molecule level and used to infer the recruitment probability (see [Supplementary Note 7](#)). It was  
1180 confirmed experimentally that SOS in our system indeed was stably tethered to the bilayer via  
1181 Ras in the absence of free nucleotide. For Y64A experiments SOS engaged the membrane in a  
1182 transient manner (**Fig. 2c**) and the extent of binding was inferred from the observed peak binding  
1183 during the SOS pulse instead of from the plateau (see data in **Fig. 2d**).

1184 The nucleotide exchange reaction was initiated by providing a continuous flow of nucleotide (120  
1185  $\mu$ M GDP or GTP). SOS desorption and nucleotide exchange kinetics were quantified at different  
1186 time-points by acquiring an image of the fluorescent nucleotide on Ras and 10 images of the  
1187 labeled SOS. For each time-point we imaged at a different position in the flow chamber to avoid  
1188 bleaching. The 10 images of SOS for each position allowed us to discard immobile SOS in the  
1189 analysis (i.e., SOS bound to defects in the bilayer). This is a crucial aspect of the experimental  
1190 design as it avoids bias from sample-to-sample variation in the number of defects as well as  
1191 possible differential tendencies of various protein constructs to adhere to bilayer defects. By  
1192 counting membrane-bound SOS based on single molecule tracking we can focus entirely on  
1193 species that are laterally mobile.

1194 A clear demonstration that the assay probes specific interactions between Ras and SOS comes  
1195 from the observation that all SOS constructs tested exhibit sensitivity to the nucleotide state of  
1196 Ras with consistently increased recruitment probability as well as prolonged residency period on  
1197 membranes displaying RasGTP (**Fig. 2d, Supplementary Fig. 3a-c**).

1198 For specific comparison of desorption for successfully activated SOS constructs (**Fig. 3c**) traces  
1199 were normalized to the SOS count at the membrane observed at the initiation of the nucleotide  
1200 chase. For SOS<sup>Cat</sup> we observed a fraction of rapidly desorbing species during the first few seconds  
1201 of the chase (**Fig. 2c**). This fast desorbing fraction was not contributing to processive Ras  
1202 turnover (**Supplementary Fig. 1d**) and for the comparison with other constructs in **Figure 3c** and  
1203 **Supplementary Figure 3b,c** we cropped the first 10 s of the trace.

Deleted: /

Deleted: Data analysis

Deleted: section below)

Deleted: (indicated by †

Deleted: 4

Deleted: .

... [9]

Deleted: significantly

Deleted: 2b

Deleted: 4

1214 **Maintenance and transfection of DT40 and Jurkat cell lines**

1215 Culture maintenance, plasmid transfection and BCR stimulation of chicken DT40 B cell lines  
1216 were carried out as previously described{Jun, 2013 #37;Jun, 2013 #37}. Jurkat cell culture and  
1217 transfection techniques were also performed as described{Das, 2009 #10}. The SOS1-2-deficient  
1218 DT40 cells were generated in Dr. Tomohiro Kurosaki's laboratory (RIKEN). Both wildtype and  
1219 SOS1-2-deficient DT40 B cells were gifts from Dr. Kurosaki. Obtained cell lines were confirmed  
1220 to be free of mycoplasma contamination. For routine cell functional authentication, surface  
1221 expression of B cell receptor (BCR) was confirmed by flow cytometry and by BCR-induced  
1222 pERK2 measurement similar to the experiment shown in **Supplementary Figure 4**. Jurkat cells  
1223 were obtained from ACCC and were maintained according to the provided guideline.

Deleted: /

Deleted: /

Deleted: For authentication, surface expression of B cell receptor (BCR) was routinely confirmed by flow cytometry for surface BCR (not shown). Routine functional authentication includes BCR-induced stimulation and intracellular staining of pERK2 similar

Deleted: 6

Deleted: 6a

1225 To generate EGFP-tagged hSOS1 variants, EGFP coding sequence (CDS) was PCR-amplified  
1226 with Xba I- and Not I-flanked primers from pEGFP-N1 plasmid (Clontech). Resulting SOS1-  
1227 EGFP construct bears a 5 amino acid linker (SRGGR) between SOS1 and EGFP CDS.  
1228 Expression was confirmed by Western blotting with anti-GFP antibody (**Supplementary Fig. 4a**).

1229 **Live cell imaging**

1230 For live cell microscopy, 2.5 million cells were exchanged from cell culture media to 1mL of  
1231 serum-free RPMI by pelleting cells with 5 min. centrifugation at 500g, followed by 30 min.  
1232 incubation in serum-free RPMI at 37°C. Cells were imaged in pH 7.40, 10 mM HEPES, 68 mM  
1233 NaCl, 2.5 mM KCl, 0.35 mM Na<sub>2</sub>HPO<sub>4</sub>, 3 mM D-Glucose, 1 mM CaCl<sub>2</sub>, 2 mM MgCl<sub>2</sub>, 0.1%  
1234 BSA.

1235 Live-cell imaging was performed using a stage-top incubator and an objective heater (Chamlide  
1236 TC-A, Quorum Technology, Guelph, Canada). Experiments were initiated by adding cells to  
1237 SLBs functionalized with an antibody for the BCR. The bilayer was heated to 37°C prior to  
1238 addition of cells. 488nm channel (SOS-EGFP) and 640nm channel (BCR engaged antibody on  
1239 SLBs) For a few selected cells TIRF images were acquired every ~1-5 minutes to follow the  
1240 kinetics of the signaling reaction. After ~30 min. of adding cells to the chamber, 488nm and  
1241 640nm TIRF, together with bright field and RICM micrographs were acquired at a number of  
1242 positions in the microscope chamber.

Deleted: Canade

1243 **Flow cytometry and data analysis**

1244 Jurkat T cells were transiently transfected for 20 hours with 10 µg of wild-type or allosteric  
1245 mutant (W729E) SOS<sup>cat</sup>-encoding plasmid together with 10 µg of GFP plasmid. The activity of  
1246 Ras-ERK pathway was measured by FACS staining of surface CD69 (sCD69, BD: #555531)  
1247 together with GFP intensity measurement. GFP-positive cells were sub-gated into 9 fractions.  
1248 Geometric mean fluorescence of CD69 level was determined for each fraction.

1249 For quantitative and qualitative assay of RAS-ERK signal module, intracellular staining of BCR-  
1250 induced ERK phosphorylation was performed according to established procedures{Jun, 2013  
1251 #37}. In brief, cells were stimulated with BCR crosslinking mouse IgM (clone M4) for desired  
1252 time period. Stimulation was then stopped by adding 4% paraformaldehyde-PBS, and cells were  
1253 fixed for 20 min at room temperature. Fixed cells were washed three times with FACS wash  
1254 buffer (PBS; 1% BSA; 10mM EDTA) and subsequently permeabilized with pre-chilled 90%  
1255 methanol overnight. Cells were then washed three times with FACS wash buffer and stained for  
1256 pERK with rabbit anti-sera (Cell signaling #9101). pERK was visualized by secondary staining  
1257 with goat anti-rabbit IgG conjugated with APC (Jackson immunochemicals; #711-136-152).

Deleted: /

Deleted: /

Deleted: /

1258 For FACS acquisition, a minimum of 100,000 events were collected for each time point using  
1259 FACS Calibur machine (BD) and analyzed by FlowJo software. For analysis of ERK activation,  
1260 cells were sorted in nine bins of equal interval according to their SOS expression level. Subsets

1276 with less than 100 acquired events were disregarded for fair comparison of SOS1 variants with  
1277 different expression level.

1278  
1279

#### **COS1 cell transfections and immunofluorescence staining**

1280 COS1 cells were cultured and treated as previously described{Gureasko, 2008 #4}. COS1 cells  
1281 were obtained from ACCC. In brief, cells grown on cover slips were transfected with either the  
1282 pCGT-T7-SOS<sup>Cat</sup> or SOS<sup>Cat</sup>-L687E, R688A constructs together with GFP-tagged H-Ras<sup>A59G</sup>,  
1283 D38E<sub>2</sub>-encoding plasmid. After 24 h, transfected cells were fixed in 3.7% (v/v) formaldehyde and  
1284 permeabilized with 0.1% (v/v) Triton X-100. Expressed SOS proteins were visualized by staining  
1285 with anti-T7 antibody ([EMD Millipore; #AB3790](#)), followed by rhodamine-conjugated anti-  
1286 mouse antibody (Cappel; [#R-6393](#)). Rab5 protein was expressed as a GFP fusion protein. EGF  
1287 was obtained from Invitrogen. Imaging was conducted on a Zeiss Axiovert 200M microscope.  
1288

Deleted: Novagen

#### **Optical microscopy platforms**

1289

1290 Epi-fluorescence and total internal reflection fluorescence (TIRF) microscopy was performed on  
1291 a Nikon Eclipse Ti inverted microscope with a Nikon Apo TIRF 100x oil immersion objective  
1292 (1.49 NA) and an EMCCD camera (Andor iXon 597DU, Andor Inc., South Windsor, CT). A  
1293 mercury arc lamp was used for epi-fluorescence illumination. 488 nm (Sapphire HP; Coherent  
1294 Inc., Santa Clara, CA) and 647 nm (RCL-050-640; Crystalaser, Reno, NV) lasers were used for  
1295 through the objective TIRF imaging. Bandpass emission filters for 488 and 647 nm TIRF images  
1296 were HQ515/30 and HQ700/75 (Chroma Technology Corp., Bellows Falls, VT), respectively.  
1297 The microscope was operated using MetaMorph software (Molecular Devices Corp., Downingtown,  
1298 PA).  
1299

1300 For live cell experiments, an additional TIRF setup was employed with the following  
1301 specifications: Inverted microscope body (Nikon Eclipse Ti (Ti HUBC/A), Technical Instruments,  
1302 Burlingame, CA) equipped with a Nikon Apo TIRF 100x oil objective (1.49 NA). The  
1303 microscope had a custom-built laser launch with 488 nm, 561 nm and 633 nm lasers (all from the  
1304 OBIS product line, Coherent Inc. Santa Clara, CA) controlled via a laser control module (OBIS  
1305 scientific remote). The TIRF setup operated in through the objective mode and images were  
1306 collected on an EMCCD (iXon ultra 897, Andor Inc., South Windsor, CT). The microscope was  
1307 controlled using  $\mu$ Manager{Edelstein, 2010 #31}.

1308 Confocal microscopy was performed on a custom build spinning disk confocal system{Greene,  
1309 2014 #77}. Briefly, images were captured using a Nikon Apo TIRF 100x oil immersion objective  
1310 (1.49 NA) and an EMCCD (Andor iXon3 888, Belfast, Ireland) and the microscope was  
1311 controlled using  $\mu$ Manager{Edelstein, 2010 #31}. Axial slice step size was 0.5  $\mu$ m.  
1312

#### **[Data analysis](#)**

1314 [A detailed description of data analysis procedures relating to imaging experiments can be found](#)  
1315 [in Supplementary Note 7.](#)  
1316

Deleted: -

... [10]

#### **[Code availability](#)**

1318 [Supplementary Note 7 provides a detailed account of employed data analysis procedures which](#)  
1319 [can be implemented in a given coding language.](#)  
1320

#### **online Methods references**

1321
